# Supplementary material for: Surface dual-oxidation induced metallic copper doping into NiFe electrodes for electrocatalytic water oxidation
Source: Royal Society of Chemistry journal article supplement (doi:10.1039/c9ta08797d), 2019-01-01
Supplement: c9ta08797d1.pdf [file c9ta08797d1.pdf]

Supporting Information

Surface dual-oxidation induced metallic copper dopant into NiFe  
electrode for electrocatalytic water oxidation

Yaming Ma, Ke Wang, Dongyu Liu, Xuxiao Yang, Hu Wu, Chunhui Xiao\* and  
Shujiang Ding\*

Xi'an Key Laboratory of Sustainable Energy Materials Chemistry, Department of  
Applied Chemistry, School of Science, Xi'an Jiaotong University, Xianning West  
Road, Xi'an 710049, China

Email: [chunhuixiao@xjtu.edu.cn](mailto:chunhuixiao@xjtu.edu.cn), [dingsj@xjtu.edu.cn](mailto:dingsj@xjtu.edu.cn)

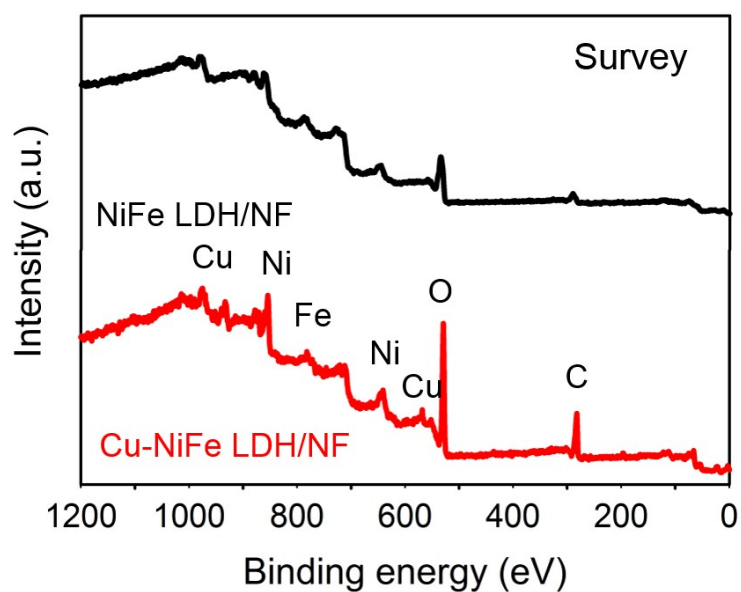

**Figure S1.** XPS spectra of survey scan of Cu-NiFe LDH/NF and NiFe LDH/NF.

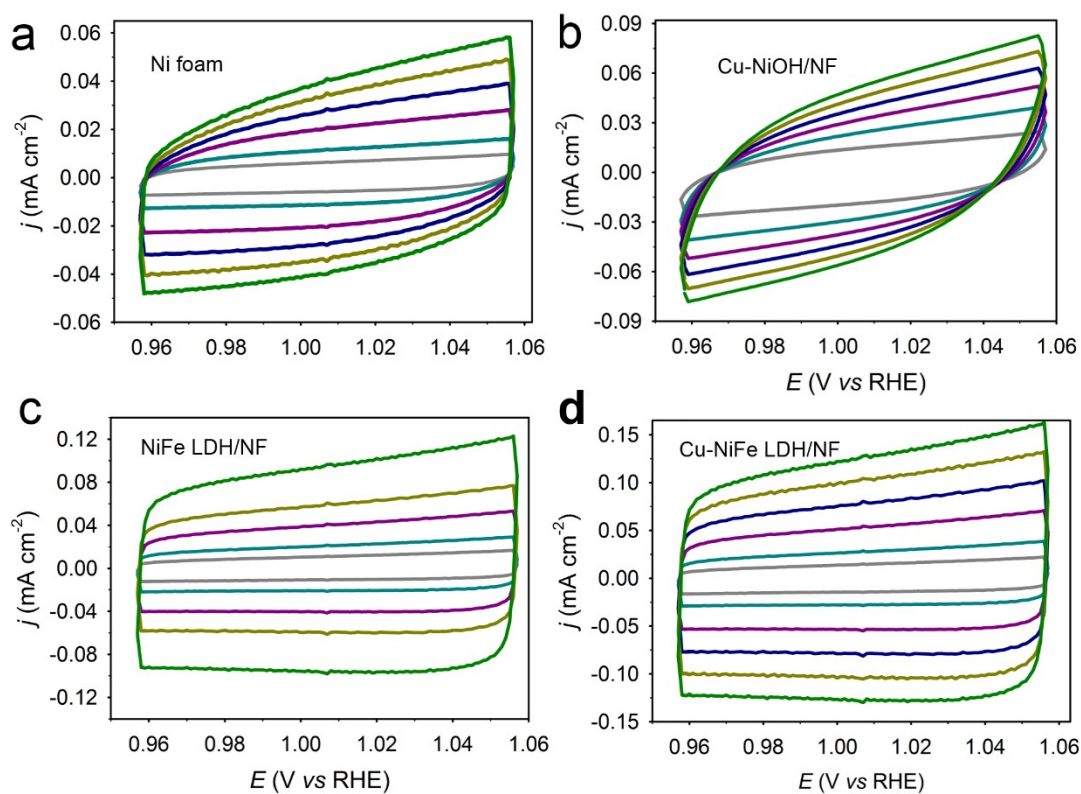

**Figure S2.** (a-d) CVs of NF, Cu-NiOH/NF, NiFe LDH/NF and Cu-NiFe LDH/NF at various scan rates.

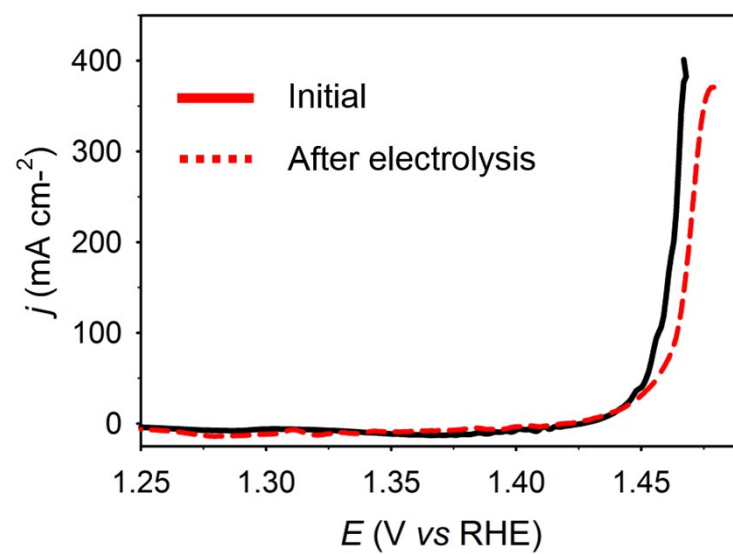

**Figure S3.** LSV curves before and after long-time electrolysis

**Table S1** Comparisons of OER electrocatalytic activity of this work of NiFe-based catalysts vs other reported NiFe-based OER electrocatalysts in the past few years.

| Electrocatalysts                              | $E_{10}$ (V vs RHE) | Tafel slope (mV dec <sup>-1</sup> ) | Electrode | References                                                |
|-----------------------------------------------|---------------------|-------------------------------------|-----------|-----------------------------------------------------------|
| NiFe ANTAs/CFC                                | 220                 | 57                                  | CFC       | <i>ACS Appl. Mater. Interfaces</i> , 2017, 9, 34954-34960 |
| NiFe LDH/RGO                                  | 245                 | N.A.                                | RGO       | <i>J. Am. Chem. Soc.</i> 2013, 135, 8452-8455             |
| GDY@NiFe                                      | 260                 | 95                                  | Cu foil   | <i>ACS Appl. Mater. Interfaces</i> , 2019, 11, 2662-2669  |
| NiFe/C                                        | 210                 | 30                                  | GCE       | <i>ACS Appl. Mater. Interfaces</i> , 2015, 7, 9203-9210   |
| hcp-NiFe@NC                                   | 226                 | 41                                  | CC        | <i>Angew. Chem.</i> 10.1002/ange.201902446                |
| NiFeRu-LDH                                    | 225                 | -                                   | NF        | <i>Adv. Mater.</i> , 2018, 30, 1706279                    |
| NiFeS <sub>x</sub> /NiFe(OH) <sub>y</sub> /NF | $E_{100}$ 341       | 58                                  | NF        | <i>Appl. Catal. B: Environmental</i> , 2019, 246, 337-348 |
| NiFe-OH NS/NF-7                               | ≈210                | 46.7                                | NF        | <i>Appl. Catal. B: Environmental</i> , 2019, 244, 844–852 |
| CS-NiFeCu/NF                                  | 180                 | 33                                  | NF        | <i>Nat. Commun.</i> , 2018, 381                           |
| NiFe LDHs/NF                                  | 269                 | 48.3                                | NF        | <i>Nat. Commun.</i> , 2018, 2609                          |
| NiFeCe-LDH/CNT                                | 227                 | 33                                  | GC        | <i>ACS Appl. Mater. Interfaces</i> , 2018, 10, 6336-6345  |
| NiFeV-LDHs/NF                                 | 231                 | 39.4                                | NF        | <i>Small</i> , 2018, 14, 1703257                          |
| <b>Cu-NiFe LDH/NF</b>                         | <b>185</b>          | <b>30</b>                           | <b>NF</b> | <b>This Work</b>                                          |
| <b>NiFe LDH/NF</b>                            | <b>219</b>          | <b>33</b>                           | <b>NF</b> | <b>This Work</b>                                          |
